# Supplementary material for: Analysis of Sampling Bias in Large Health Care Claims Databases
Source: PubMed Central journal article supplement (PMC9857613; doi:10.1001/jamanetworkopen.2022.49804), 2023-01-06
Supplement: jamanetwopen-e2249804-s002.pdf [file jamanetwopen-e2249804-s002.pdf]

## Data Sharing Statement

Dahlen. Analysis of Sampling Bias in Large Health Care Claims Databases. *JAMA Netw Open*. Published January 06, 2023. doi:10.1001/jamanetworkopen.2022.49804

### Data

**Data available:** No

### Additional Information

**Explanation for why data not available:** Optum CDM data is not publicly available, unfortunately.
